# Supplementary material
Source: Springer Nature journal article supplement (https://www.springermedizin.de/resource/supplementary/12958_2009_538_MOESM2_ESM.pdf/9568256)

# Promoter Length (bp)

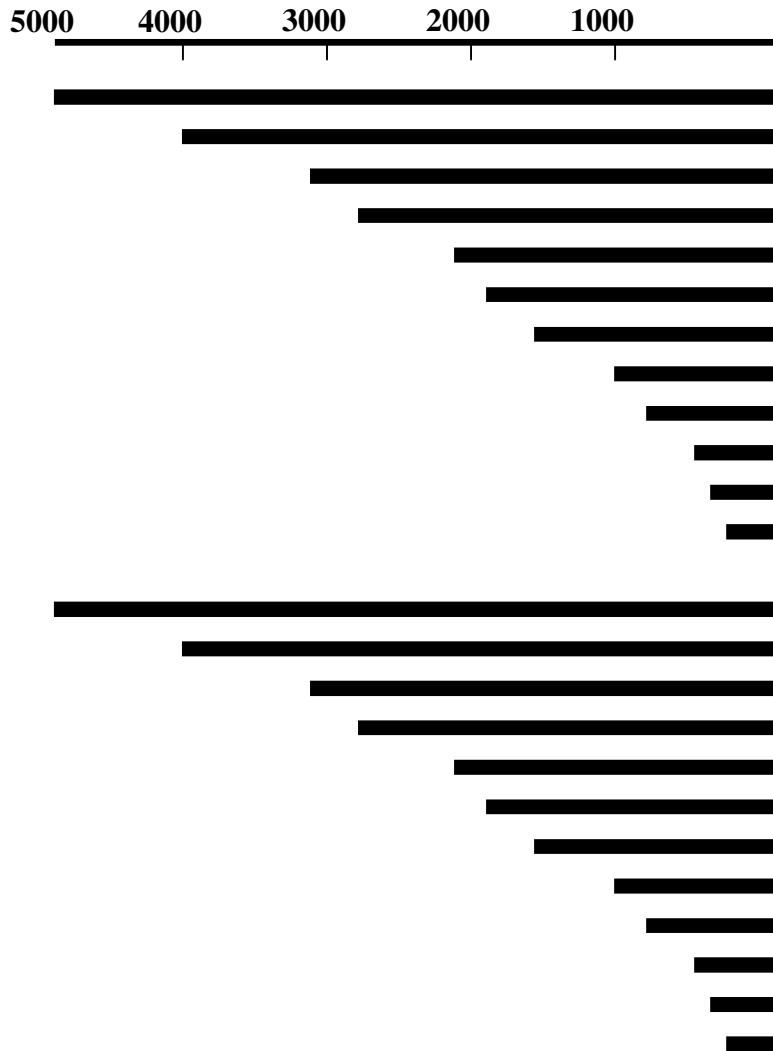

0 1 2 3 4 5 6 7 8 9 10 11

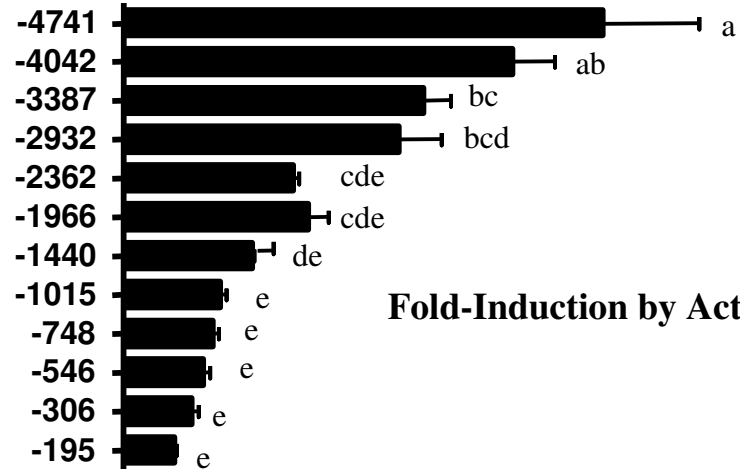

## Fold-Induction by Activin A

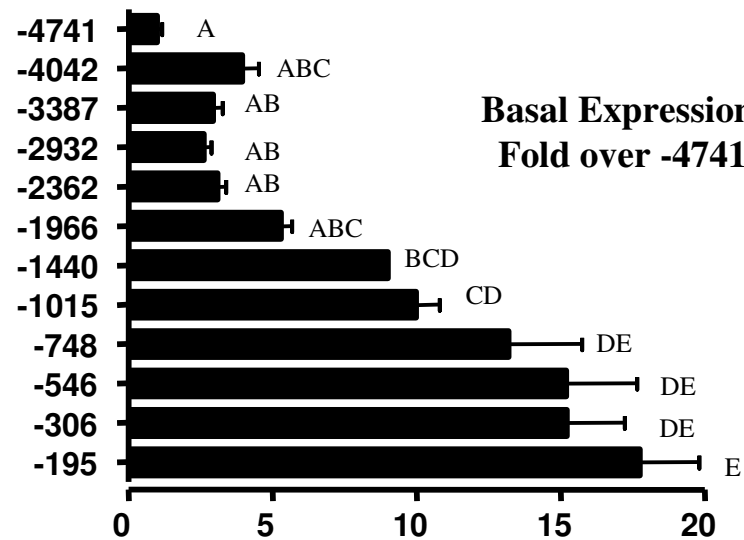

## Basal Expression Fold over -4741

Supplement: MOESM2 [file 9568256]
